# Supplementary material
Source: PubMed Central journal article supplement (PMC3044984)
Supplement: supp_M110.178780_jbc.M110.178780-2.pdf [file supp_M110.178780_jbc.M110.178780-2.pdf]

| Oligo name   | Gene   | Accession |
|--------------|--------|-----------|
| Ptch1PF      | Ptch1  | NM_008957 |
| Ptch1PR      | Ptch1  | NM_008957 |
| Ptch1PMut1F  | Ptch1  | NM_008957 |
| Ptch1PMut1R  | Ptch1  | NM_008957 |
| Ptch1PMut2F  | Ptch1  | NM_008957 |
| Ptch1PMut2R  | Ptch1  | NM_008957 |
| Ptch1PMut3F  | Ptch1  | NM_008957 |
| Ptch1PMut3R  | Ptch1  | NM_008957 |
| EMSA1F       | Ptch1  | NM_008957 |
| EMSA1R       | Ptch1  | NM_008957 |
| EMSA2F       | Ptch1  | NM_008957 |
| EMSA2R       | Ptch1  | NM_008957 |
| EMSA3F       | Ptch1  | NM_008957 |
| EMSA3R       | Ptch1  | NM_008957 |
| EMSA1CF      | Ptch1  | NM_008957 |
| EMSA1CR      | Ptch1  | NM_008957 |
| EMSA2CF      | Ptch1  | NM_008957 |
| EMSA2CR      | Ptch1  | NM_008957 |
| EMSA3CF      | Ptch1  | NM_008957 |
| EMSA3CR      | Ptch1  | NM_008957 |
| ChiP1F       | Ptch1  | NM_008957 |
| ChiP1R       | Ptch1  | NM_008957 |
| ChiP2F       | Ptch1  | NM_008957 |
| ChiP2R       | Ptch1  | NM_008957 |
| ZNF431F      | ZNF431 | BC_012405 |
| ZNF431R      | ZNF431 | BC_012405 |
| Ptch1F       | Ptch1  | NM_008957 |
| Ptch1R       | Ptch1  | NM_008957 |
| CbapF        |        |           |
| StopR        |        |           |
| ZNF-R2       |        |           |
| HAZNF431F    | ZNF431 | BC_012405 |
| HAZNF431R    | ZNF431 | BC_012405 |
| ZNF431 RNAiR | ZNF431 | BC_012405 |
| CDOF         | CDO    | NM_021339 |
| CDOR         |        |           |
| BOCF         | BOC    | NM_172506 |
| BOCR         |        |           |
| DISP1F       | DISP1  | NM_026866 |
| DISP1R       |        |           |
| DISP2F       | DISP2  | NM_170593 |
| DISP2R       |        |           |
| FUF          | Stk36  | NM_175031 |
| FUR          |        |           |
| HhatF        | Hhat   | NM_144881 |
| HhatR        |        |           |
| Kif7F        | Kif7   |           |
| Kif7R        |        |           |
| SmoF         | Smo    | NM_176996 |

|        |      |              |
|--------|------|--------------|
| SmoR   |      |              |
| SufuF  | Sufu | AF134893     |
| SufuR  |      |              |
| IHH F  | lhh  | NM_010544    |
| IHH R  |      |              |
| DHH F  | Dhh  | NM_007857    |
| DHH R  |      |              |
| Shh F  | Shh  | NM_009170    |
| Shh R  |      |              |
| Gli1 F | Gli1 | NM_010296    |
| Gli1 R |      |              |
| Gli2 F | Gli2 | NM_001081125 |
| Gli2 R |      |              |
| Gli3 F | Gli3 | NM_008130    |
| Gli3 R |      |              |

### **RNAi Constructs**

|        |        |           |
|--------|--------|-----------|
| ShRNA1 | ZNF431 | BC_012405 |
| ShRNA2 | ZNF431 | BC_012405 |
| ShRNA3 | ZNF431 | BC_012405 |
| ShRNA4 | ZNF431 | BC_012405 |
| ShRNA5 | ZNF431 | BC_012405 |

| Sequence                              | Position     |
|---------------------------------------|--------------|
| 5'-ACAGGGTGTGTATCGAGCTT-3'            | -1741- -1722 |
| 5'-GTTGCCGCGCCGCGCCGC-3'              | -17- -1      |
| 5'-GGACCGCGAGGCGAGCTCTGGAAGCGCCGG-3   | -278- -249   |
| 5'- CCGGCGCTTCCAGAGCTCGCCTCGCGGTCC -3 | -278- -249   |
| 5'-GCAGCACCCGCAGAGCTCGCCGTGTGAGCG-3   | -133- -104   |
| 5'-CGCTCACACGGCGAGCTCTGCGGGTGCTGC-3'  | -133- -104   |
| 5'-CTCGCGAGCCGAGAGCTCAGGCGCGCCGGA-3   | -51- -25     |
| 5'- TCCGGCGCGCCTGAGCTCTCGGCTCGCGAG-3  | -51- -25     |
| 5'- ATGCCGAGGCGCGCCCTGGAAGC-3'        | -272- -254   |
| 5'- ATGCGCTTCCAGGGCGCGCCTCG-3'        |              |
| 5'-ATGCCCCGCAGCGCCCCGCCGTGT-3'        | -137- -109   |
| 5'-ATGCACACGGCGGGCGCTGCGGG-3'         |              |
| 5'- ATGCAGCCGAGCGCCCAGGCGCG-3'        | -45- -27     |
| 5'- ATGCCGCGCCTGGGCGCTCGGCT-3'        |              |
| 5'- ATGCCGAGTCTATAAATTTAAGC-3'        | -272- -254   |
| 5'- ATGCGCTTAAATTTATAGACTCG-3         |              |
| 5'- ATGCCCCGCATATAAAGCCGTGT-3'        | -137- -109   |
| 5'- ATGCACACGGCTTTTATAGCGGG-3'        |              |
| 5'- ATGCAGCCTATATAAAATTCGCG -3'       | -45- -27     |
| 5'- ATGCCGCGAATTTTATATAGGCT -3'       |              |
| 5'-GCAAAGACCTCGGGACTCAC-3'            | -298 - -276  |
| 5'-GTGAGTCCCGAGGTCTTT -3'             | -206 - -189  |
| 5'- AAGGCGCAGGGTCTGAGT -3'            | -171- -154   |
| 5'- TACCAGCCGAGGCCATGT -3'            | 16-1         |
| 5'-TAGGGAGTGTGGCCTTTCTG- 3'           | 1831-1850    |
| 5'-GTGTCCAAGCAGACATGGTG- 3'           | 1985-1966    |
| 5'-CTATGAGAGCTACCCTGAGACTGA-3',       | 4152-4175    |
| 5'-CTGTAGCTCTATGACCTCCACCTT-3' '      | 4260-4237    |
| 5'-TATGGTAATCGTGCGAGAGG-3'            |              |
| 5'-AAACGAAAAGGCCGAGATCG-3'            |              |
| 5'- TCAGCAAAGCCCATTCTTCT-3'           |              |
| 5'-CCCTGTGTGGATCTCAAGGT-3'            |              |
| 5'-AATGTGAGCAATGTGGCAA-3' '           |              |
| 5'-TGCGTTCTTTTATGCATTCG-3'            | 1725-1706    |
| 5'-GGAACCAGTCCAGAACGTGT-3'            | 6516-6535    |
| 5'-GGAGAGATTCCCGAACATGA-3'            | 6639-6620    |
| 5'-CTGGCACAAGACAGAAAGCA-3'            | 4031-4050    |
| 5'-TAGGGTCCTTCCACCAAGTG-3'            | 4176-4157    |
| 5'-GTCTTCCCAGGACAGCAGAG-3'            | 4545-4564    |
| 5'-CTGTGTCCCCTGGGTCTCTA-3'            | 4676-4657    |
| 5'-TCCGAGGGGTGTGAGTTTAG-3'            | 6062-6081    |
| 5'-GGTGGTCTTCATGCCAAGAT-3'            | 6174-6155    |
| 5'-CTTGGGCCCTTTTCTAGCTT-3'            | 4698-4717    |
| 5'-GCCCCAGTCGTGTCTGTATT-3'            | 4825-4806    |
| 5'-TCAAGTGGCCCAGCTAGAGT-3'            | 2453-2472    |
| 5'-GCTGTGAGAGGAACCAT-3'               | 2596-2577    |
| 5'-CTGAACCTCTCTGGCAGTCC-3'            | 3780-3799    |
| 5'-AAGCTTGAGCGTTTCCATGT-3'            | 3888-3869    |
| 5'-CTTCAGGACCCTTGCTTCTG-3'            | 3107-3126    |

|                             |           |
|-----------------------------|-----------|
| 5'-ACCATCATCCCTGTCTCTGC-3'  | 3210-3191 |
| 5'-TCCAGGTTACCGCTATCGTC-3'  | 302-321   |
| 5'-GAGATCACTCAGGCCAAAGC-3'  | 441-422   |
| 5'-CCGAACCTTCATCTTGGTGT-3'  | 1832-1851 |
| 5'-CCCCGAGAAACATTGGAGTA-3'  | 1987-1968 |
| 5'-ATCCACGTATCGGTCAAAGC-3'  | 812-831   |
| 5'-GTAGTTCCCTCAGCCCCTTC -3' | 926-907   |
| 5'-CCTCTCCTGCTATGCTCCTG-3'  | 2132-2151 |
| 5'-GTGGCGGTTACAAAGCAAAT-3'  | 2379-2360 |
| 5'-GAAGGAATTCGTGTGCCATT-3'  | 965-984   |
| 5'-GCAACCTTCTTGCTCACACA-3'  | 1184-1165 |
| 5'-CCACAGACATGTGCGTATCC-3'  | 6178-6197 |
| 5'-CACACCACAAGAGCCAGAGA-3'  | 6419-6400 |
| 5'-TGCCCATCAGCTACTCAGTG-3'  | 4409-4428 |
| 5'-TTGTTGCAGAGTGAGGTTGC-3'  | 4658-4639 |

|                       |           |
|-----------------------|-----------|
| GCCTTTGCAAATCAAAGTTAT | 1513-1533 |
| GCATACTAAAGAGTAACCCTA | 1723-1743 |
| GCCTATTCACGACACAGCATT | 421-441   |
| GCCTCTCATAATAAACTTCAA | 1183-1203 |
| CCTCTCATGGTCAACTTCAA  | 932-952   |

Note  
1.7kb promoter  
1.7kb promoter  
SMG1  
SMG1  
SMG2  
SMG2  
SMG3  
SMG3  
EMSA

EMSA

EMSA

Realtime

Realtime

Genotyping Common  
Genotyping Flox  
Genotyping delta  
HA
